# Supplementary material for: Fragmentation pathways analysis for the gas phase dissociation of protonated carnosine-oxaliplatin complexes
Source: Royal Society of Chemistry journal article supplement (doi:10.1039/c4dt02217c), 2014-09-26
Supplement: c4dt02217c2.pdf [file c4dt02217c2.pdf]

Table S2: Electronic energies, Zero-Point Vibrational Energies, Thermal Energies, Entropies and relative free energies for species calculated at B3LYP/LANL2DZ. for structures described in Figures 4 and 8. Italicized relative free energy values are in kcal mol<sup>-1</sup> while values in parentheses are in kJ mol<sup>-1</sup>.

| Structure                                            | Electronic energy (Hartrees) | ZPE (kcal mol <sup>-1</sup> ) | $H_{298}^o - H_0^o$ (kcal mol <sup>-1</sup> ) | Entropy (cal mol <sup>-1</sup> K <sup>-1</sup> ) | Relative free energy at 298 K |
|------------------------------------------------------|------------------------------|-------------------------------|-----------------------------------------------|--------------------------------------------------|-------------------------------|
| <b>1A</b>                                            | -1639.2886242                | 312.6                         | 19.6                                          | 196.8                                            | <i>0.0</i> (0.0)              |
| <b>TS<sub>(1A→1D)</sub></b>                          | -1639.2696380                | 312.8                         | 19.8                                          | 200.6                                            | <i>11.1</i> (46.4)            |
| <b>1D</b>                                            | -1639.2817215                | 312.8                         | 20.0                                          | 202.8                                            | <i>3.1</i> (13.0)             |
| <b>TS<sub>(1D→1E)</sub></b>                          | -1639.2682464                | 311.8                         | 19.8                                          | 199.7                                            | <i>11.3</i> (47.3)            |
| <b>1E</b>                                            | -1639.285837                 | 312.6                         | 19.8                                          | 199.3                                            | <i>1.1</i> (4.6)              |
| <b>TS<sub>(1E→2C)</sub></b>                          | -1639.1570269                | 307.9                         | 20.5                                          | 208.7                                            | <i>75.2</i> (314.6)           |
| <b>2C</b>                                            | -1639.2923679                | 311.7                         | 21.1                                          | 221.7                                            | <i>-9.2</i> (-38.5)           |
| <b>2B + CO<sub>2</sub></b>                           | -1639.288777                 | 312.0                         | 20.5                                          | 235.1                                            | <i>-11.3</i> (-47.3)          |
| <b>TS<sub>(2B→3A)</sub> + CO<sub>2</sub></b>         | -1639.232367                 | 309.8                         | 20.6                                          | 241.0                                            | <i>20.3</i> (84.9)            |
| <b>3A + CO<sub>2</sub></b>                           | -1639.262436                 | 310.4                         | 20.9                                          | 244.4                                            | <i>1.3</i> (5.4)              |
| <b>TS<sub>(3A→4A)</sub> + CO<sub>2</sub> + HCOOH</b> | -1639.101313                 | 305.2                         | 21.1                                          | 283.6                                            | <i>85.6</i> (358.2)           |
| <b>4A + CO<sub>2</sub> + HCOOH</b>                   | -1639.229491                 | 307.3                         | 21.7                                          | 256.1                                            | <i>7.2</i> (-30.1)            |
