# Supplementary material for: Fragmentation pathways analysis for the gas phase dissociation of protonated carnosine-oxaliplatin complexes
Source: Royal Society of Chemistry journal article supplement (doi:10.1039/c4dt02217c), 2014-09-26
Supplement: c4dt02217c4.pdf [file c4dt02217c4.pdf]

Table S4: Electronic energies, Zero-Point Vibrational Energies, Thermal Energies, Entropies and relative free energies for species calculated at B3LYP/LANL2DZ for structures shown in Figure 6. Italicized relative free energy values are in kcal mol<sup>-1</sup> while values in parentheses are in kJ mol<sup>-1</sup>.

| Structure                                  | Electronic energy (Hartrees) | ZPE (kcal mol <sup>-1</sup> ) | $H_{298}^o - H_0^o$ (kcal mol <sup>-1</sup> ) | Entropy (cal mol <sup>-1</sup> K <sup>-1</sup> ) | Relative free energy at 298 K |
|--------------------------------------------|------------------------------|-------------------------------|-----------------------------------------------|--------------------------------------------------|-------------------------------|
| <b>1A</b>                                  | -1639.2886242                | 312.6                         | 19.6                                          | 196.8                                            | <i>0.0</i> (0.0)              |
| <b>TS<sub>(1A→1D)</sub></b>                | -1639.2696380                | 312.8                         | 19.8                                          | 200.6                                            | <i>11.1</i> (46.4)            |
| <b>1D</b>                                  | -1639.2817215                | 311.3                         | 20.0                                          | 202.8                                            | <i>3.1</i> (13.0)             |
| <b>TS<sub>(1D→OxPtH)</sub> + Carnosine</b> | -1639.2181703                | 311.7                         | 19.9                                          | 201.9                                            | <i>42.0</i> (175.7)           |
| <b>TS<sub>(1D→Car)</sub> + OxPt</b>        | -1639.1995789                | 310.5                         | 19.8                                          | 201.5                                            | <i>52.5</i> (219.7)           |
| <b>OxPtH + Car</b>                         | -1639.2368711                | 312.7                         | 20.3                                          | 207.3                                            | <i>30.0</i> (125.5)           |
| <b>Car + OxPtH</b>                         | -1639.2798599                | 313.6                         | 19.2                                          | 201.1                                            | <i>5.4</i> (22.6)             |
